# Supplementary material
Source: MDPI journal article supplement (https://www.mdpi.com/2073-4352/10/5/390)
Supplement: s1 [file s1]

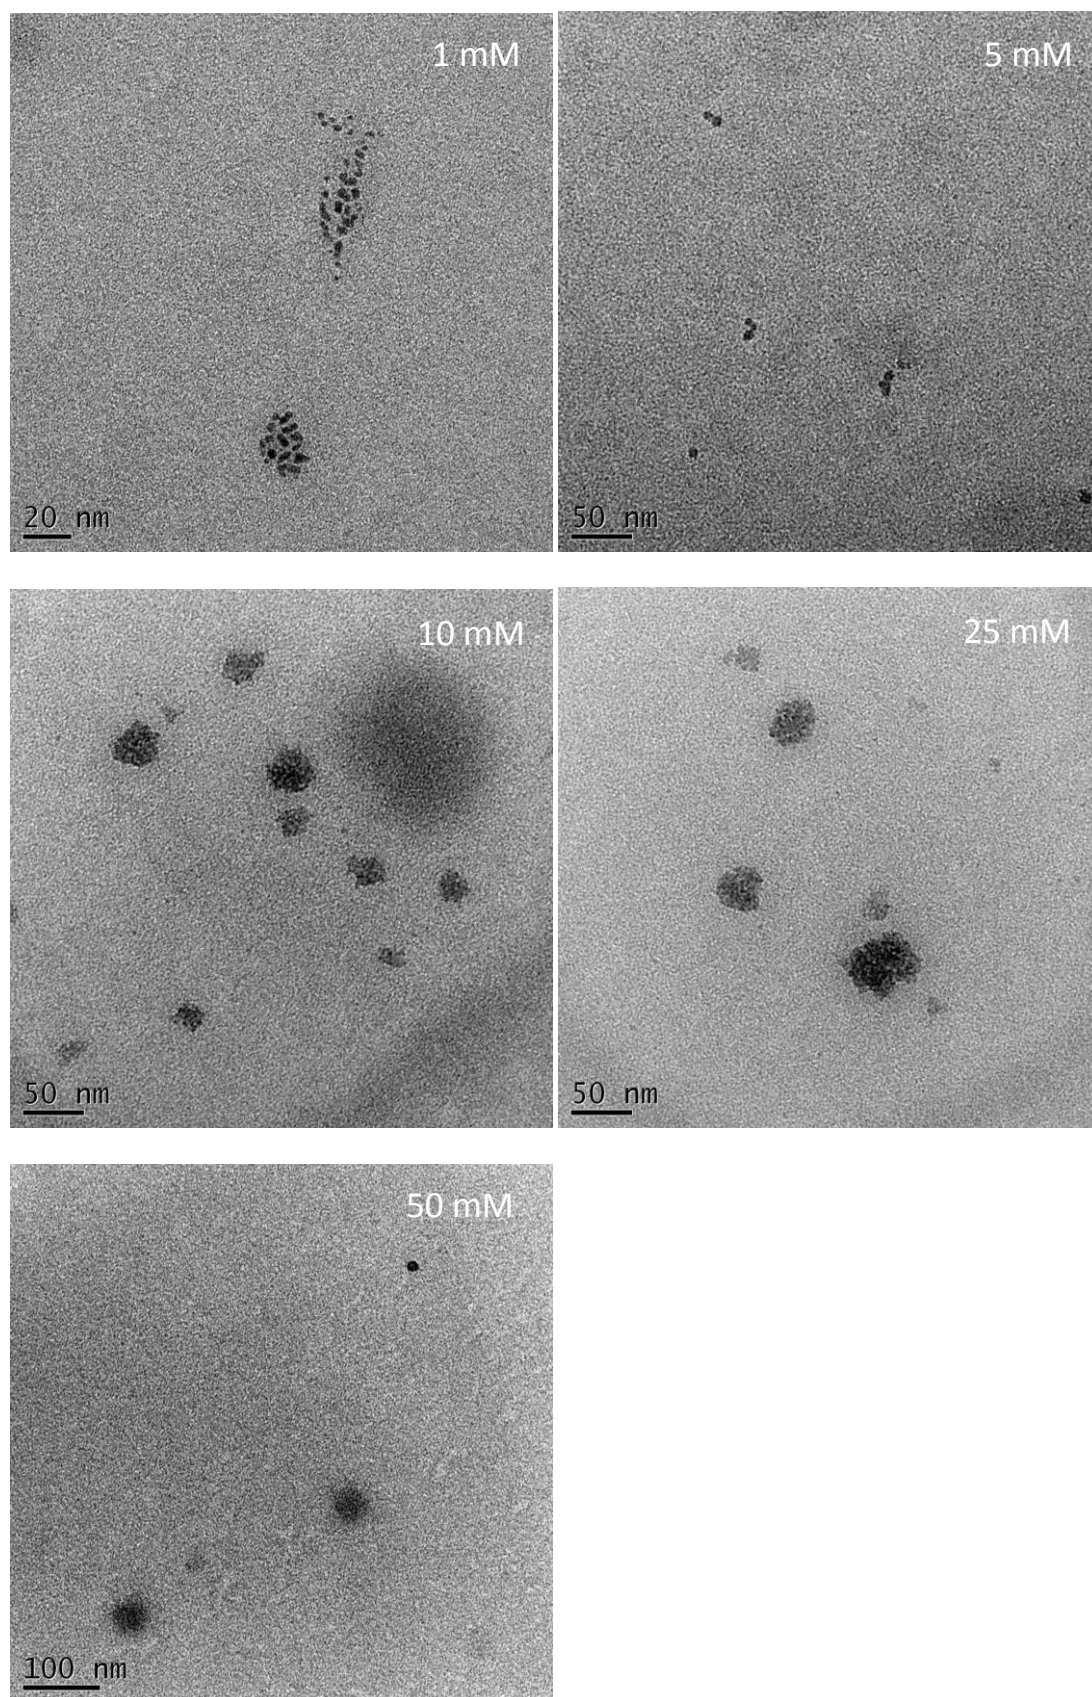

Fig. S1 TEM images of the self-assembly nanoparticles prepared from different solutions (from 1 to 50 mM).
