# Supplementary material
Source: MDPI journal article supplement (https://www.mdpi.com/2073-4352/10/5/390)
Supplement: s1 [file s1]

Archive with 2 entries (2 files):
- Fig S2.pdf
- Fig S1.pdf
